# Supplementary material for: Multi-product biorefineries from lignocelluloses: a pathway to revitalisation of the sugar industry?
Source: PubMed Central journal article supplement (PMC5387292; doi:10.1186/s13068-017-0761-9), 2017-04-11
Supplement: 13068_2017_761_MOESM1_ESM.pdf [file 13068_2017_761_MOESM1_ESM.pdf]

# **Multi-product biorefineries from lignocelluloses: A pathway to revitalisation of the Sugar Industry?**

Somayeh Farzad,<sup>\*a</sup> Mohsen Ali Mandegari,<sup>\*a</sup> Miao Guo,<sup>b</sup> Kathleen F. Haigh,<sup>a</sup> Nilay Shah<sup>b</sup> and Johann F.

Görgens<sup>✉a</sup>

\* Equal Contribution

✉ Correspondence: E-mail: jgorgens@sun.ac.za; Department of Process Engineering, Stellenbosch University, Stellenbosch 7600, South Africa

Supplementary Information: 16 Tables and 1 Figure

**Table S1** The main parameters implemented for the Aspen simulation of biorefinery scenarios

| <i>Parameter</i>                            | <i>Value</i> | <i>Parameter</i>                                       | <i>Value</i> |
|---------------------------------------------|--------------|--------------------------------------------------------|--------------|
| <b>Pretreatment of Scenarios 1, 2 and 3</b> |              | <b>Pretreatment of Scenario 4</b>                      |              |
| Low pressure steam % wt of DM               | 10 %         | Acid flow per biomass % wt                             | 1.8 %        |
| SO <sub>2</sub> % wt of DM                  | 1.9 %        | Cellulose → Glucose                                    | 6.9 %        |
| High pressure steam % wt of DM              | 50. %        | Xylan → Xylose                                         | 87.4 %       |
| Cellulose → Glucose                         | 7.0 %        | Xylan → Furfural                                       | 5 %          |
| Cellulose → Acetic Acid                     | 6.3 %        | <b>SSF (Scenario 4)</b>                                |              |
| Xylan → Xylose                              | 80.1 %       | Cellulose → Glucose                                    | 95.0 %       |
| Xylan → Furfural                            | 3.1 %        | Xylan → Xylose                                         | 95.0 %       |
| <b>SSCF (Scenario 1)</b>                    |              | Glucose → Butanol                                      | 55.7 %       |
| Cellulose → Glucose                         | 74.5 %       | Glucose → Ethanol                                      | 6.6 %        |
| Glucose → Ethanol                           | 90.5 %       | Glucose → Acetone                                      | 31.1 %       |
| Xylose → Ethanol                            | 76.6 %       | Xylose → Butanol                                       | 20.1 %       |
| Ethanol concentration % wt                  | 5.5 %        | Xylose → Ethanol                                       | 4.2 %        |
| <b>Xylose fermentation Scenario 2</b>       |              | Xylose → Acetone                                       | 18.5 %       |
| Xylose → Lactic Acid                        | 95.0 %       | <b>Gasification (Scenarios 5 and 6)</b>                |              |
| <b>Xylose fermentation Scenario 3</b>       |              | Feedstock split % wt of DM                             | 42 %         |
| Xylose → Furfural                           | 83.0 %       | Steam for gasification % wt of DM                      | 100 %        |
| <b>In common units</b>                      |              |                                                        |              |
| <b>Boiler unit</b>                          |              | <b>Steam and power unit</b>                            |              |
| Deaerator pressure                          | 3.3 atm      | Number of extractions                                  | 3            |
| Deaerator temperature                       | 108 °C       | Turbine isotropic efficiency                           | 85 %         |
| Boiler feed water pressure                  | 62.2 atm     | Mechanical efficiency                                  | 96 %         |
| Boiler feed water temperature               | 176 °C       | Sugar mill's steam extraction                          | 27.6 atm     |
| HHP steam pressure                          | 62.2 atm     | 1 <sup>st</sup> extraction pressure                    | 13 atm       |
| HHP steam temperature                       | 452 °C       | 2 <sup>nd</sup> extraction pressure                    | 9.5 atm      |
| Averaged burner temperature                 | 870 °C       | Condensate turbine pressure                            | 0.1 atm      |
| Combustion conversion                       | 98 %         | <b>Wastewater treatment unit</b>                       |              |
| Inlet economizer temperature                | 278 °C       | Wastewater temperature                                 | 35 °C        |
| Air preheat temperature                     | 185 °C       | Chemical oxygen demand (COD)                           | 16 g/L       |
| Stack temperature                           | 149 °C       | Biological oxygen demand per COD                       | 70 %         |
| Boiler heat loss (total)                    | 5 %          | Organic component → 3CH <sub>4</sub> + CO <sub>2</sub> | 90 %         |
| <b>Evaporation unit</b>                     |              | Methane to removed COD @ 25°C                          | 0.23 kg/kg   |
| First effect pressure                       | 0.385 atm    | Nutrient (per COD)                                     | 37 g/kg      |
| LPS % of liquid inlet                       | 5 %          | COD of treated water                                   | 0.1 g/L      |
| Second effect pressure                      | 0.26 atm     |                                                        |              |
| Third effect pressure                       | 0.21 atm     |                                                        |              |
| Fourth effect pressure                      | 0.16 atm     |                                                        |              |

**Table S2** Utilities condition of the developed biorefinery scenarios

|                           | Supplied            |                   | Return              |                   |
|---------------------------|---------------------|-------------------|---------------------|-------------------|
|                           | Temperature<br>(°C) | Pressure<br>(atm) | Temperature<br>(°C) | Pressure<br>(atm) |
| Chilled water             | 4                   | 2                 | 15                  | 1                 |
| Cooling water             | 28                  | 2                 | 37                  | 1                 |
| Cooling air               | 30                  | 1                 | 35                  | 1                 |
| High pressure steam (HPS) | 266                 | 13                | 192                 | 12                |
| Low pressure steam (LPS)  | 233                 | 9.5               | 170                 | 8                 |
| Sugar mill steam demand   | 338                 | 27.6              | 122                 | 2.2               |

Table S3 The specific energy consumption of the studied biorefinery scenarios (data of Figure 4)

|                               | Cooling (kW/t*) | Heating (kW/t*) | Power (kW/t*) |
|-------------------------------|-----------------|-----------------|---------------|
| Scenario 1: Ethanol           | 1198.8          | 1634.9          | 48.0          |
| Scenario 2: Ethanol, LA       | 1166.5          | 1707.8          | 51.3          |
| Scenario 3: Ethanol, Furfural | 1599.9          | 2041.1          | 71.7          |
| Scenario 4: Butanol           | 1873.7          | 822.3           | 580.6         |
| Scenario 5: Methanol          | 620.6           | 61.8            | 335.4         |
| Scenario 6: FTS               | 744.6           | 51.9            | 300.7         |

\*: Specific energy consumption is defined as: kW of consumed energy per tonne feedstock to biorefinery (kw/t)



**Table S5** Inventory for Sugarcane Cultivation\*

| <i>Sugar cane agriculture</i>                             | <b>Value</b>               | <b>unit</b>        |
|-----------------------------------------------------------|----------------------------|--------------------|
| Cultivation area                                          | 400000                     | ha                 |
| Average cane harvest                                      | 60                         | t/ha               |
| Irrigation water requirements                             | 8000                       | m <sup>3</sup> /ha |
| Electricity consumption for irrigation                    | 108                        | kWh/ha             |
| N <sub>2</sub> O emissions from soil                      | 1.5(1.25% of N input)      | kg                 |
| NO <sub>x</sub> emissions from soil                       | 0.6(0.5% of N input)       | kg                 |
| <b><i>Fertilizer application rate/ha</i></b>              |                            |                    |
| Urea, N                                                   | 120                        | kg                 |
| Diammonium phosphate (DAP), P <sub>2</sub> O <sub>5</sub> | 30                         | kg                 |
| Potassium oxide, KCl                                      | 125                        | kg                 |
| Herbicides use                                            | 1614(26.9g/ton sugar cane) | g                  |
| Herbicides loss in water bodies                           | 3.228(0.2%)                | g                  |
| Nitrogen loss in water bodies                             | 161.4(10%)                 | g                  |
| Phosphorus loss in surface runoff/ha                      | 1                          | kg                 |
| Pesticide use                                             | 132.6                      | g                  |
| <b><i>Cane transportation</i></b>                         |                            |                    |
| Transportation, average distance, by:                     |                            |                    |
| road(94% of cane)                                         | 25                         | km                 |
| rail(6% of cane)                                          | 50                         | km                 |
| Diesel consumption:                                       |                            |                    |
| Truck                                                     | 1.08                       | MJ/tkm             |
| rail                                                      | 0.68                       | MJ/tkm             |
| Fertilizers and herbicides transport distance             | 60                         | km                 |

\*Mashoko, L., Mbohwa, C., Thomas, V.M., 2010. LCA of the South African Sugar Industry. *J. Environ. Plan. Manag.* 53, 793–807

**Table S6** Inventory for Sugarcane processing in the sugar mill\*

| Sugar processing                                  |                   |
|---------------------------------------------------|-------------------|
| Sugarcane                                         | 6.0t              |
| Bagasse produced                                  | 27.8% of cane     |
| Molasses produced                                 | 4.1% of cane      |
| Filter cake produced                              | 6.8% of cane      |
| Steam consumed/t of cane                          | 520kg             |
| Electricity consumption/t of cane                 | 35kWh             |
| Electricity generation/t of cane                  | 150kWh            |
| Coal consumption/t of cane                        | 8.4kg             |
| Water used for cane processing/t cane             | 0.6m <sup>3</sup> |
| Pollutant loadings of COD/t of cane               | 3320              |
| Pollutant loadings of BOD <sub>5</sub> /t of cane | 1590              |

\*Mashoko, L., Mbohwa, C., Thomas, V.M., 2010. LCA of the South African Sugar Industry. J. Environ. Plan. Manag. 53, 793–807

**Table S7** Inventory for the investigated biorefinery scenarios (per 65 ton/hour biomass processed)

| <b>Inputs (Feedstock and Chemicals)</b>          | <b>EtOH</b> | <b>EtOH &amp; Lactic acid</b> | <b>EtOH &amp; Furfural</b> | <b>Butanol</b> | <b>Methanol</b> | <b>FT syncrude</b> |
|--------------------------------------------------|-------------|-------------------------------|----------------------------|----------------|-----------------|--------------------|
| <b>Bagasse and brown leaves (kg)</b>             | 6.50E+04    | 6.50E+04                      | 6.50E+04                   | 6.50E+04       | 6.50E+04        | 6.50E+04           |
| <b>Sulphure</b>                                  | 2.77E+02    | 2.10E+02                      | 2.43E+02                   | -              | -               | -                  |
| <b>Sulphuric acid (93%) (kg)</b>                 | 4.00E-01    | 3.68E-01                      | 3.07E-01                   | 2.55E+02       | -               | -                  |
| <b>Ammonia (kg)</b>                              | 3.00E+01    | 3.31E+01                      | 1.37E+01                   | 8.22E+02       | -               | -                  |
| <b>Diammonium phosphate (kg)</b>                 | 4.40E+01    | 9.43E+01                      | 3.75E+01                   | -              | -               | -                  |
| <b>Triethylamine (TEA) (kg)</b>                  | -           | 1.09E+02                      | -                          | -              | -               | -                  |
| <b>MgSO<sub>4</sub></b>                          | -           | 5.00E+01                      | -                          | -              | -               | -                  |
| <b>Mg(OH)<sub>2</sub></b>                        | -           | 5.50E+00                      | -                          | -              | -               | -                  |
| <b>Glucose (kg)</b>                              | 7.54E+02    | 6.96E+02                      | 6.38E+02                   | -              | -               | -                  |
| <b>Boiler &amp; cooling tower Chemicals (kg)</b> | 3.00E+02    | 3.00E+02                      | 3.00E+02                   | 3.00E+02       | 2.50E+02        | 2.50E+02           |
| <b>NaOCl (kg)</b>                                | 5.70E+00    | 5.06E+00                      | 6.40E+00                   | 3.60E+00       | -               | -                  |
| <b>Tetrahydrofuran (THF) (kg)</b>                | -           | -                             | 6.43E+02                   | -              | -               | -                  |
| <b>NaCl (kg)</b>                                 | -           | -                             | 2.00E+03                   | -              | -               | -                  |
| <b>HCl (kg)</b>                                  | -           | -                             | 1.05E+03                   | -              | -               | -                  |
| <b>Outputs</b>                                   |             |                               |                            |                |                 |                    |
| <b>Ethanol production (kg)</b>                   | 1.10E+04    | 6.73E+03                      | 5.66E+03                   | 3.53E+02       | -               | -                  |
| <b>Lactic acid production (kg)</b>               | -           | 4.65E+03                      | -                          | -              | -               | -                  |
| <b>Furfural Production (kg)</b>                  | -           | -                             | 2.07E+03                   | -              | -               | -                  |
| <b>Acetic acid (kg)</b>                          | -           | -                             | 1.25E+03                   | -              | -               | -                  |
| <b>Formic acid (kg)</b>                          | -           | -                             | 2.28E+02                   | -              | -               | -                  |
| <b>Butanol production (kg)</b>                   | -           | -                             | -                          | 4.61E+03       | -               | -                  |
| <b>Aceton (kg)</b>                               | -           | -                             | -                          | 1.48E+03       | -               | -                  |
| <b>Methanol production (kg)</b>                  | -           | -                             | -                          | -              | 1.28E+04        | -                  |
| <b>FT syncrude production (kg)</b>               | -           | -                             | -                          | -              | -               | 5.81E+03           |
| <b>Exported electricity (MW)</b>                 | 7.10E+00    | 5.60E+00                      | 7.50E+00                   | 4.30E+00       | 5.00E-01        | 1.80E+00           |
| <b>Emissions and waste disposal</b>              |             |                               |                            |                |                 |                    |
| <b>EtOH (kg)</b>                                 | 9.82E-01    | 1.82E+01                      | 4.24E+00                   | 6.01E+00       | -               | -                  |
| <b>CO<sub>2</sub> (kg)</b>                       | 8.99E+04    | 9.42E+04                      | 8.89E+04                   | 9.63E+04       | 5.87E+04        | 5.79E+04           |
| <b>SO<sub>2</sub> (kg)</b>                       | 1.63E+01    | 1.85E+01                      | 7.60E+00                   | 8.56E+00       | -               | -                  |
| <b>Acetic Acid (kg)</b>                          | 6.43E+00    | 7.46E+00                      | 1.69E+00                   | 6.60E-01       | -               | -                  |
| <b>Furfural (kg)</b>                             | 2.02E+00    | 1.96E+00                      | 4.48E-01                   | 2.77E-01       | -               | -                  |
| <b>CH<sub>4</sub> (kg)</b>                       | 2.28E+00    | 2.28E+00                      | 1.58E+00                   | -              | -               | 6.42E+01           |
| <b>NO<sub>2</sub> (kg)</b>                       | 4.60E-02    | 4.60E-02                      | 4.60E-02                   | 4.60E-02       | 3.75E+00        | 3.08E+00           |
| <b>CO</b>                                        | 3.00E-03    | 3.00E-03                      | 3.00E-03                   | 4.00E-03       | 7.76E+01        | 7.76E+01           |
| <b>Acetone (kg)</b>                              | -           | -                             | -                          | 1.73E+02       | -               | -                  |
| <b>NO (kg)</b>                                   | -           | -                             | -                          | -              | 2.01E+02        | 1.66E+02           |
| <b>C<sub>4</sub>H<sub>10</sub> (kg)</b>          | -           | -                             | -                          | -              | -               | 5.47E+00           |
| <b>Landfill disposal of ash (kg)</b>             | 3.25E+03    | 3.04E+03                      | 3.10E+03                   | 2.28E+03       | 7.88E+02        | 7.88E+02           |



**Table S8** LCIA profiles of bioethanol production (unit: 1 ton bioethanol; method: CML-IA baseline V3.02)

| <b>Impact category</b>                | <b>Unit</b>                         | <b>Total</b> | <b>Pre-treatment</b> | <b>Enzyme production</b> | <b>SSCH</b> | <b>EtOH purification</b> | <b>Evaporation</b> | <b>Combustion</b> | <b>Waste water treatment</b> | <b>Biomass production</b> | <b>AD</b> |
|---------------------------------------|-------------------------------------|--------------|----------------------|--------------------------|-------------|--------------------------|--------------------|-------------------|------------------------------|---------------------------|-----------|
| <b>Abiotic depletion</b>              | kg Sb eq                            | 4.51E-04     | 1.90E-06             | 2.26E-05                 | 6.10E-06    | 0.00E+00                 | 0.00E+00           | 2.62E-05          | 2.20E-06                     | 3.90E-04                  | 2.14E-06  |
| <b>Abiotic depletion(fossil fuel)</b> | MJ                                  | 1.93E+03     | 3.90E+02             | 9.87E+01                 | 6.50E+01    | 0.00E+00                 | 0.00E+00           | 3.76E+02          | 6.02E+00                     | 9.95E+02                  | 3.27E+00  |
| <b>GWP<sub>100</sub></b>              | kg CO <sub>2</sub> eq               | 4.57E+03     | 3.61E+00             | 9.10E+01                 | 3.84E+00    | 5.21E+02                 | 0.00E+00           | 3.87E+03          | 3.37E-01                     | 8.24E+01                  | 2.71E-01  |
| <b>ODP</b>                            | kg CFC-11 eq                        | 4.44E-05     | 4.11E-06             | 6.27E-06                 | 7.79E-07    | 0.00E+00                 | 0.00E+00           | 3.16E-06          | 6.87E-08                     | 2.99E-05                  | 1.27E-07  |
| <b>Human toxicity</b>                 | kg 1,4-DB eq                        | 1.19E+03     | 9.85E-01             | 2.06E+01                 | 1.89E+00    | 1.84E-02                 | 0.00E+00           | 1.03E+03          | 2.61E-01                     | 1.39E+02                  | 1.77E-01  |
| <b>Fresh water eco-toxicity</b>       | kg 1,4-DB eq                        | 3.13E+02     | 4.26E-01             | 4.88E+00                 | 3.51E-01    | 0.00E+00                 | 0.00E+00           | 2.85E+02          | 7.27E-02                     | 2.22E+01                  | 1.26E-01  |
| <b>Marine aquatic eco-toxicity</b>    | kg 1,4-DB eq                        | 3.86E+05     | 1.50E+03             | 4.52E+04                 | 1.24E+03    | 0.00E+00                 | 0.00E+00           | 2.59E+05          | 3.22E+02                     | 7.80E+04                  | 3.90E+02  |
| <b>Terrestrial eco-toxicity</b>       | kg 1,4-DB eq                        | 9.75E-01     | 6.04E-03             | 1.29E-01                 | 6.11E-03    | 0.00E+00                 | 0.00E+00           | 6.66E-01          | 9.89E-04                     | 1.66E-01                  | 1.24E-03  |
| <b>POCP</b>                           | kg C <sub>2</sub> H <sub>4</sub> eq | 1.57E-01     | 2.28E-03             | 2.09E-02                 | 1.31E-03    | 1.64E-02                 | 2.12E-02           | 2.34E-02          | 3.16E-02                     | 3.95E-02                  | 7.88E-05  |
| <b>Acidification</b>                  | kg SO <sub>2</sub> eq               | 2.27E+00     | 3.86E-02             | 5.35E-01                 | 2.77E-02    | 2.30E-01                 | 0.00E+00           | 2.02E-01          | 6.38E-01                     | 5.96E-01                  | 1.88E-03  |
| <b>Eutrophication</b>                 | kg PO <sub>4</sub> <sup>3-</sup> eq | 2.26E+00     | 5.17E-03             | 4.59E-01                 | 2.54E-03    | 1.36E-01                 | 0.00E+00           | 1.37E+00          | 5.78E-04                     | 2.77E-01                  | 6.56E-04  |

**Table S9** LCIA profiles of bioethanol and lactic acid production (unit: 1ton Lactic acid; method: CML-IA baseline V3.02)

| Impact category                       | Unit                                | Total    | Pre-treatment | Enzyme production | SSCH     | EtOH purification | Evaporation | Combustion | Waste water treatment | Biomass production | AD       | Lactic Acid production |
|---------------------------------------|-------------------------------------|----------|---------------|-------------------|----------|-------------------|-------------|------------|-----------------------|--------------------|----------|------------------------|
| <b>Abiotic depletion</b>              | kg Sb eq                            | 8.24E-04 | 2.32E-06      | 3.68E-05          | 8.91E-06 | 0.00E+00          | 0.00E+00    | 3.86E-05   | 3.47E-06              | 6.15E-04           | 3.00E-06 | 1.16E-04               |
| <b>Abiotic depletion(fossil fuel)</b> | MJ                                  | 3.49E+03 | 4.66E+02      | 1.66E+02          | 9.49E+01 | 0.00E+00          | 0.00E+00    | 5.54E+02   | 9.48E+00              | 1.57E+03           | 4.57E+00 | 6.30E+02               |
| <b>GWP<sub>100</sub></b>              | kg CO <sub>2</sub> eq               | 7.41E+03 | 4.31E+00      | 1.34E+02          | 5.61E+00 | 5.67E+02          | 0.00E+00    | 6.54E+03   | 5.32E-01              | 1.30E+02           | 3.80E-01 | 2.39E+01               |
| <b>ODP</b>                            | kg CFC-11 eq                        | 6.99E-05 | 4.91E-06      | 9.38E-06          | 1.14E-06 | 0.00E+00          | 0.00E+00    | 4.65E-06   | 1.08E-07              | 4.71E-05           | 1.78E-07 | 2.40E-06               |
| <b>Human toxicity</b>                 | kg 1,4-DB eq                        | 1.79E+03 | 1.18E+00      | 3.07E+01          | 2.77E+00 | 1.09E-02          | 0.00E+00    | 1.52E+03   | 4.41E-01              | 2.19E+02           | 2.47E-01 | 1.83E+01               |
| <b>Fresh water eco-toxicity</b>       | kg 1,4-DB eq                        | 4.70E+02 | 5.10E-01      | 7.26E+00          | 5.12E-01 | 0.00E+00          | 0.00E+00    | 4.20E+02   | 1.15E-01              | 3.51E+01           | 1.76E-01 | 5.75E+00               |
| <b>Marine aquatic eco-toxicity</b>    | kg 1,4-DB eq                        | 5.97E+05 | 1.79E+03      | 6.63E+04          | 1.82E+03 | 0.00E+00          | 0.00E+00    | 3.82E+05   | 5.07E+02              | 1.23E+05           | 5.46E+02 | 2.11E+04               |
| <b>Terrestrial eco-toxicity</b>       | kg 1,4-DB eq                        | 1.50E+00 | 7.22E-03      | 1.90E-01          | 8.92E-03 | 0.00E+00          | 0.00E+00    | 9.81E-01   | 1.56E-03              | 2.62E-01           | 1.73E-03 | 4.94E-02               |
| <b>POCP</b>                           | kg C <sub>2</sub> H <sub>4</sub> eq | 7.86E-01 | 2.73E-03      | 3.08E-02          | 1.92E-03 | 1.15E-02          | 3.15E-01    | 5.30E-02   | 2.98E-01              | 6.23E-02           | 1.10E-04 | 1.11E-02               |
| <b>Acidification</b>                  | kg SO <sub>2</sub> eq               | 3.87E+00 | 4.62E-02      | 7.87E-01          | 4.04E-02 | 1.37E-01          | 0.00E+00    | 3.78E-01   | 1.37E+00              | 9.40E-01           | 2.63E-03 | 1.64E-01               |
| <b>Eutrophication</b>                 | kg PO <sub>4</sub> <sup>3-</sup> eq | 3.29E+00 | 6.18E-03      | 6.68E-01          | 3.72E-03 | 1.08E-01          | 0.00E+00    | 2.03E+00   | 9.11E-04              | 4.37E-01           | 9.19E-04 | 4.10E-02               |

**Table S10** LCIA profiles of bioethanol and furfural production (unit: 1ton Furfural; method: CML-IA baseline V3.02)

| Impact category                       | Unit                                | Total    | Pre-treatment | Enzyme production | SSCH     | EtOH purification | Evaporation | Combustion | Waste water treatment | Biomass production | AD       | Furfural production |
|---------------------------------------|-------------------------------------|----------|---------------|-------------------|----------|-------------------|-------------|------------|-----------------------|--------------------|----------|---------------------|
| <b>Abiotic depletion</b>              | kg Sb eq                            | 2.98E-03 | 2.74E-06      | 2.71E-05          | 7.54E-06 | 0.00E+00          | 0.00E+00    | 4.16E-05   | 3.66E-06              | 6.50E-04           | 4.01E-06 | 2.24E-03            |
| <b>Abiotic depletion(fossil fuel)</b> | MJ                                  | 9.41E+03 | 5.70E+02      | 8.93E+01          | 8.03E+01 | 0.00E+00          | 0.00E+00    | 5.97E+02   | 1.00E+01              | 1.66E+03           | 6.12E+00 | 6.40E+03            |
| <b>GWP<sub>100</sub></b>              | kg CO <sub>2</sub> eq               | 7.91E+03 | 5.28E+00      | 1.25E+02          | 4.74E+00 | 4.72E+02          | 0.00E+00    | 6.76E+03   | 5.63E-01              | 1.37E+02           | 5.08E-01 | 4.00E+02            |
| <b>ODP</b>                            | kg CFC-11 eq                        | 1.40E-04 | 6.01E-06      | 8.24E-06          | 9.62E-07 | 0.00E+00          | 0.00E+00    | 5.02E-06   | 1.14E-07              | 4.98E-05           | 2.37E-07 | 6.99E-05            |
| <b>Human toxicity</b>                 | kg 1,4-DB eq                        | 2.11E+03 | 1.44E+00      | 2.76E+01          | 2.34E+00 | 8.47E-03          | 0.00E+00    | 1.64E+03   | 3.97E-01              | 2.31E+02           | 3.31E-01 | 2.11E+02            |
| <b>Fresh water eco-toxicity</b>       | kg 1,4-DB eq                        | 6.48E+02 | 6.22E-01      | 6.60E+00          | 4.33E-01 | 0.00E+00          | 0.00E+00    | 4.53E+02   | 1.21E-01              | 3.71E+01           | 2.36E-01 | 1.50E+02            |
| <b>Marine aquatic eco-toxicity</b>    | kg 1,4-DB eq                        | 1.07E+06 | 2.19E+03      | 6.27E+04          | 1.54E+03 | 0.00E+00          | 0.00E+00    | 4.12E+05   | 5.36E+02              | 1.30E+05           | 7.31E+02 | 4.58E+05            |
| <b>Terrestrial eco-toxicity</b>       | kg 1,4-DB eq                        | 2.77E+00 | 8.83E-03      | 1.77E-01          | 7.54E-03 | 0.00E+00          | 0.00E+00    | 1.06E+00   | 1.65E-03              | 2.77E-01           | 2.32E-03 | 1.24E+00            |
| <b>POCP</b>                           | kg C <sub>2</sub> H <sub>4</sub> eq | 4.35E-01 | 3.33E-03      | 2.84E-02          | 1.62E-03 | 7.11E-03          | 1.03E-01    | 1.94E-02   | 5.94E-02              | 6.59E-02           | 1.48E-04 | 1.46E-01            |
| <b>Acidification</b>                  | kg SO <sub>2</sub> eq               | 5.49E+00 | 5.65E-02      | 7.32E-01          | 3.42E-02 | 1.06E-01          | 0.00E+00    | 3.12E-01   | 5.83E-01              | 9.94E-01           | 3.52E-03 | 2.67E+00            |
| <b>Eutrophication</b>                 | kg PO <sub>4</sub> <sup>3-</sup> eq | 4.26E+00 | 7.56E-03      | 6.44E-01          | 3.14E-03 | 5.73E-02          | 0.00E+00    | 2.18E+00   | 9.63E-04              | 4.62E-01           | 1.23E-03 | 8.99E-01            |

**Table S11** LCIA profiles of butanol production (unit: 1ton butanol; method: CML-IA baseline V3.02)

| <b>Impact category</b>                | <b>Unit</b>                         | <b>Total</b> | <b>Pre-treatment</b> | <b>SSF</b> | <b>Combustion</b> | <b>Seed generation</b> | <b>Biomass production</b> |
|---------------------------------------|-------------------------------------|--------------|----------------------|------------|-------------------|------------------------|---------------------------|
| <b>Abiotic depletion</b>              | kg Sb eq                            | 1.16E-03     | 2.34E-04             | 2.66E-04   | 2.95E-05          | 9.07E-07               | 6.26E-04                  |
| <b>Abiotic depletion(fossil fuel)</b> | MJ                                  | 5.33E+03     | 4.68E+02             | 2.83E+03   | 4.23E+02          | 9.66E+00               | 1.60E+03                  |
| <b>GWP<sub>100</sub></b>              | kg CO <sub>2</sub> eq               | 7.83E+03     | 2.28E+01             | 1.04E+03   | 6.63E+03          | 5.71E-01               | 1.32E+02                  |
| <b>ODP</b>                            | kg CFC-11 eq                        | 9.09E-05     | 5.39E-06             | 3.39E-05   | 3.55E-06          | 1.16E-07               | 4.80E-05                  |
| <b>Human toxicity</b>                 | kg 1,4-DB eq                        | 1.48E+03     | 1.60E+01             | 8.24E+01   | 1.16E+03          | 2.81E-01               | 2.23E+02                  |
| <b>Fresh water eco-toxicity</b>       | kg 1,4-DB eq                        | 3.78E+02     | 5.80E+00             | 1.53E+01   | 3.21E+02          | 5.21E-02               | 3.57E+01                  |
| <b>Marine aquatic eco-toxicity</b>    | kg 1,4-DB eq                        | 4.88E+05     | 1.66E+04             | 5.42E+04   | 2.92E+05          | 1.85E+02               | 1.25E+05                  |
| <b>Terrestrial eco-toxicity</b>       | kg 1,4-DB eq                        | 1.32E+00     | 4.13E-02             | 2.66E-01   | 7.49E-01          | 9.08E-04               | 2.66E-01                  |
| <b>POCP</b>                           | kg C <sub>2</sub> H <sub>4</sub> eq | 1.67E+00     | 1.32E-02             | 1.55E+00   | 4.01E-02          | 1.95E-04               | 6.35E-02                  |
| <b>Acidification</b>                  | kg SO <sub>2</sub> eq               | 3.44E+00     | 3.02E-01             | 1.20E+00   | 9.76E-01          | 4.11E-03               | 9.57E-01                  |
| <b>Eutrophication</b>                 | kg PO <sub>4</sub> <sup>3-</sup> eq | 2.13E+00     | 2.93E-02             | 1.11E-01   | 1.55E+00          | 3.78E-04               | 4.45E-01                  |

**Table S12** LCIA profiles of methanol production (unit: 1ton Methanol; method: CML-IA baseline V3.02)

| <b>Impact category</b>                | <b>Unit</b>                         | <b>Total</b> | <b>Gasification &amp; Conditioning</b> | <b>Combustion</b> | <b>Biomass production</b> |
|---------------------------------------|-------------------------------------|--------------|----------------------------------------|-------------------|---------------------------|
| <b>Abiotic depletion</b>              | kg Sb eq                            | 3.89E-04     | 0.00E+00                               | 7.81E-06          | 3.82E-04                  |
| <b>Abiotic depletion(fossil fuel)</b> | MJ                                  | 1.09E+03     | 0.00E+00                               | 1.12E+02          | 9.76E+02                  |
| <b>GWP<sub>100</sub></b>              | kg CO <sub>2</sub> eq               | 2.87E+03     | 5.33E+02                               | 2.25E+03          | 8.07E+01                  |
| <b>ODP</b>                            | kg CFC-11 eq                        | 3.02E-05     | 0.00E+00                               | 9.41E-07          | 2.93E-05                  |
| <b>Human toxicity</b>                 | kg 1,4-DB eq                        | 4.54E+02     | 0.00E+00                               | 3.19E+02          | 1.36E+02                  |
| <b>Fresh water eco-toxicity</b>       | kg 1,4-DB eq                        | 1.07E+02     | 0.00E+00                               | 8.50E+01          | 2.18E+01                  |
| <b>Marine aquatic eco-toxicity</b>    | kg 1,4-DB eq                        | 1.54E+05     | 0.00E+00                               | 7.73E+04          | 7.64E+04                  |
| <b>Terrestrial eco-toxicity</b>       | kg 1,4-DB eq                        | 3.61E-01     | 0.00E+00                               | 1.99E-01          | 1.63E-01                  |
| <b>POCP</b>                           | kg C <sub>2</sub> H <sub>4</sub> eq | 1.44E-01     | 9.84E-02                               | 7.28E-03          | 3.87E-02                  |
| <b>Acidification</b>                  | kg SO <sub>2</sub> eq               | 5.43E+00     | 0.00E+00                               | 4.85E+00          | 5.84E-01                  |
| <b>Eutrophication</b>                 | kg PO <sub>4</sub> <sup>3-</sup> eq | 1.93E+00     | 0.00E+00                               | 1.66E+00          | 2.71E-01                  |

**Table S13** LCIA profiles of FT syncrude production (unit: 1ton FT syncrude; method: CML-IA baseline V3.02)

| <b>Impact category</b>                | <b>Unit</b>                         | <b>Total</b> | <b>Gasification &amp; Conditioning</b> | <b>Combustion</b> | <b>FT synthesis</b> | <b>Biomass production</b> |
|---------------------------------------|-------------------------------------|--------------|----------------------------------------|-------------------|---------------------|---------------------------|
| <b>Abiotic depletion</b>              | kg Sb eq                            | 4.49E-04     | 0.00E+00                               | 9.00E-06          | 0.00E+00            | 4.40E-04                  |
| <b>Abiotic depletion(fossil fuel)</b> | MJ                                  | 1.25E+03     | 0.00E+00                               | 1.29E+02          | 0.00E+00            | 1.12E+03                  |
| <b>GWP<sub>100</sub></b>              | kg CO <sub>2</sub> eq               | 3.35E+03     | 6.15E+02                               | 2.55E+03          | 9.56E+01            | 9.30E+01                  |
| <b>ODP</b>                            | kg CFC-11 eq                        | 3.48E-05     | 0.00E+00                               | 1.09E-06          | 0.00E+00            | 3.37E-05                  |
| <b>Human toxicity</b>                 | kg 1,4-DB eq                        | 5.21E+02     | 0.00E+00                               | 3.65E+02          | 0.00E+00            | 1.57E+02                  |
| <b>Fresh water eco-toxicity</b>       | kg 1,4-DB eq                        | 1.23E+02     | 0.00E+00                               | 9.80E+01          | 0.00E+00            | 2.51E+01                  |
| <b>Marine aquatic eco-toxicity</b>    | kg 1,4-DB eq                        | 1.77E+05     | 0.00E+00                               | 8.90E+04          | 0.00E+00            | 8.81E+04                  |
| <b>Terrestrial eco-toxicity</b>       | kg 1,4-DB eq                        | 4.16E-01     | 0.00E+00                               | 2.29E-01          | 0.00E+00            | 1.87E-01                  |
| <b>POCP</b>                           | kg C <sub>2</sub> H <sub>4</sub> eq | 5.58E-01     | 1.13E-01                               | 7.32E-03          | 3.93E-01            | 4.46E-02                  |
| <b>Acidification</b>                  | kg SO <sub>2</sub> eq               | 5.31E+00     | 0.00E+00                               | 4.64E+00          | 0.00E+00            | 6.73E-01                  |
| <b>Eutrophication</b>                 | kg PO <sub>4</sub> <sup>3-</sup> eq | 1.99E+00     | 0.00E+00                               | 1.66E+00          | 1.77E-02            | 3.13E-01                  |

**Table S14** LCIA profiles for comparison of biorefinery scenarios (method: CML-IA baseline V3.02)

| Impact category                       | Unit                                | EtOH     | EtOH & Lactic acid | EtOH & Furfural | Butanol  | Methanol | FT syntcrude |
|---------------------------------------|-------------------------------------|----------|--------------------|-----------------|----------|----------|--------------|
| <b>Abiotic depletion</b>              | kg Sb eq                            | 8.82E-03 | 1.03E-02           | 3.65E-02        | 7.48E-03 | 7.86E-04 | 7.86E-04     |
| <b>Abiotic depletion(fossil fuel)</b> | MJ                                  | 3.88E+04 | 4.47E+04           | 1.16E+05        | 5.19E+04 | 6.02E+03 | 6.02E+03     |
| <b>GWP<sub>100</sub></b>              | kg CO <sub>2</sub> eq               | 9.49E+04 | 9.76E+04           | 9.85E+04        | 9.99E+04 | 5.94E+04 | 6.03E+04     |
| <b>ODP</b>                            | kg CFC-11 eq                        | 8.81E-04 | 8.79E-04           | 1.71E-03        | 5.94E-04 | 5.76E-05 | 5.76E-05     |
| <b>Human toxicity</b>                 | kg 1,4-DB eq                        | 2.46E+04 | 2.34E+04           | 2.61E+04        | 1.64E+04 | 6.89E+03 | 6.85E+03     |
| <b>Fresh water eco-toxicity</b>       | kg 1,4-DB eq                        | 6.48E+03 | 6.16E+03           | 8.05E+03        | 4.48E+03 | 1.86E+03 | 1.86E+03     |
| <b>Marine aquatic eco-toxicity</b>    | kg 1,4-DB eq                        | 7.91E+06 | 7.76E+06           | 1.32E+07        | 4.86E+06 | 1.81E+06 | 1.81E+06     |
| <b>Terrestrial eco-toxicity</b>       | kg 1,4-DB eq                        | 2.00E+01 | 1.96E+01           | 3.44E+01        | 1.42E+01 | 4.74E+00 | 4.74E+00     |
| <b>POCP</b>                           | kg C <sub>2</sub> H <sub>4</sub> eq | 3.20E+00 | 1.03E+01           | 5.37E+00        | 2.08E+01 | 2.30E+00 | 9.53E+00     |
| <b>Acidification</b>                  | kg SO <sub>2</sub> eq               | 4.63E+01 | 5.01E+01           | 6.76E+01        | 3.36E+01 | 1.04E+02 | 8.68E+01     |
| <b>Eutrophication</b>                 | kg PO <sub>4</sub> <sup>3-</sup> eq | 4.65E+01 | 4.30E+01           | 5.27E+01        | 2.23E+01 | 3.56E+01 | 3.14E+01     |

**Table S15** LCIA profiles for comparison of different scenarios for production of 1 tonne bioethanol (method: CML-IA baseline V3.02)

| <b>Impact category</b>                | <b>Unit</b>                         | <b>EtOH</b> | <b>EtOH &amp; Lactic acid</b> | <b>EtOH &amp; Furfural</b> |
|---------------------------------------|-------------------------------------|-------------|-------------------------------|----------------------------|
| <b>Abiotic depletion</b>              | kg Sb eq                            | 7.98E-04    | 6.76E-04                      | 3.50E-03                   |
| <b>Abiotic depletion(fossil fuel)</b> | MJ                                  | 3.43E+03    | 2.87E+03                      | 1.11E+04                   |
| <b>GWP<sub>100</sub></b>              | kg CO <sub>2</sub> eq               | 8.09E+03    | 6.08E+03                      | 9.29E+03                   |
| <b>ODP</b>                            | kg CFC-11 eq                        | 7.86E-05    | 5.74E-05                      | 1.65E-04                   |
| <b>Human toxicity</b>                 | kg 1,4-DB eq                        | 2.11E+03    | 1.47E+03                      | 2.48E+03                   |
| <b>Fresh water eco-toxicity</b>       | kg 1,4-DB eq                        | 5.55E+02    | 3.85E+02                      | 7.62E+02                   |
| <b>Marine aquatic eco-toxicity</b>    | kg 1,4-DB eq                        | 6.83E+05    | 4.90E+05                      | 1.25E+06                   |
| <b>Terrestrial eco-toxicity</b>       | kg 1,4-DB eq                        | 1.73E+00    | 1.23E+00                      | 3.26E+00                   |
| <b>POCP</b>                           | kg C <sub>2</sub> H <sub>4</sub> eq | 2.77E-01    | 6.45E-01                      | 5.11E-01                   |
| <b>Acidification</b>                  | kg SO <sub>2</sub> eq               | 4.02E+00    | 3.17E+00                      | 6.45E+00                   |
| <b>Eutrophication</b>                 | kg PO <sub>4</sub> <sup>3-</sup> eq | 3.99E+00    | 2.70E+00                      | 5.00E+00                   |



**Table S16** LCIA profiles for comparison of biorefinery scenarios (method: EI 99H)

| <b>Impact category</b>              | <b>Unit</b>           | <b>EtOH</b> | <b>EtOH &amp; Lactic acid</b> | <b>EtOH &amp; Furfural</b> | <b>Butanol</b> | <b>Methanol</b> | <b>FT syntcrude</b> |
|-------------------------------------|-----------------------|-------------|-------------------------------|----------------------------|----------------|-----------------|---------------------|
| <b>Carcinogens</b>                  | DALY                  | 7.08E-03    | 6.77E-03                      | 8.60E-03                   | 5.11E-03       | 2.04E-03        | 2.04E-03            |
| <b>Resp. organics</b>               | DALY                  | 5.28E-06    | 2.01E-05                      | 1.17E-05                   | 4.40E-05       | 4.26E-07        | 5.39E-06            |
| <b>Resp. inorganics</b>             | DALY                  | 4.21E-03    | 4.52E-03                      | 7.55E-03                   | 3.27E-03       | 1.86E-02        | 1.55E-02            |
| <b>Climate change</b>               | DALY                  | 1.99E-02    | 2.05E-02                      | 2.07E-02                   | 2.10E-02       | 1.25E-02        | 1.27E-02            |
| <b>Radiation</b>                    | DALY                  | 8.04E-06    | 8.23E-06                      | 2.48E-05                   | 6.70E-06       | 9.49E-07        | 9.49E-07            |
| <b>Ozone layer</b>                  | DALY                  | 9.76E-07    | 9.75E-07                      | 2.09E-06                   | 6.21E-07       | 5.99E-08        | 5.99E-08            |
| <b>Ecotoxicity</b>                  | PAF*m <sup>2</sup> yr | 5.56E+03    | 5.37E+03                      | 7.50E+03                   | 5.26E+03       | 1.58E+03        | 1.58E+03            |
| <b>Acidification/Eutrophication</b> | PDF*m <sup>2</sup> yr | 1.28E+02    | 1.30E+02                      | 2.00E+02                   | 6.31E+01       | 1.18E+03        | 9.78E+02            |
| <b>Land use</b>                     | PDF*m <sup>2</sup> yr | 8.08E+01    | 8.77E+01                      | 1.26E+01                   | 2.96E+01       | 1.19E+01        | 1.19E+01            |
| <b>Minerals</b>                     | MJ surplus            | 8.67E+01    | 9.81E+01                      | 3.81E+02                   | 7.21E+01       | 1.20E+01        | 1.20E+01            |
| <b>Fossil fuels</b>                 | MJ surplus            | 4.23E+03    | 4.93E+03                      | 1.17E+04                   | 6.58E+03       | 6.51E+02        | 6.51E+02            |

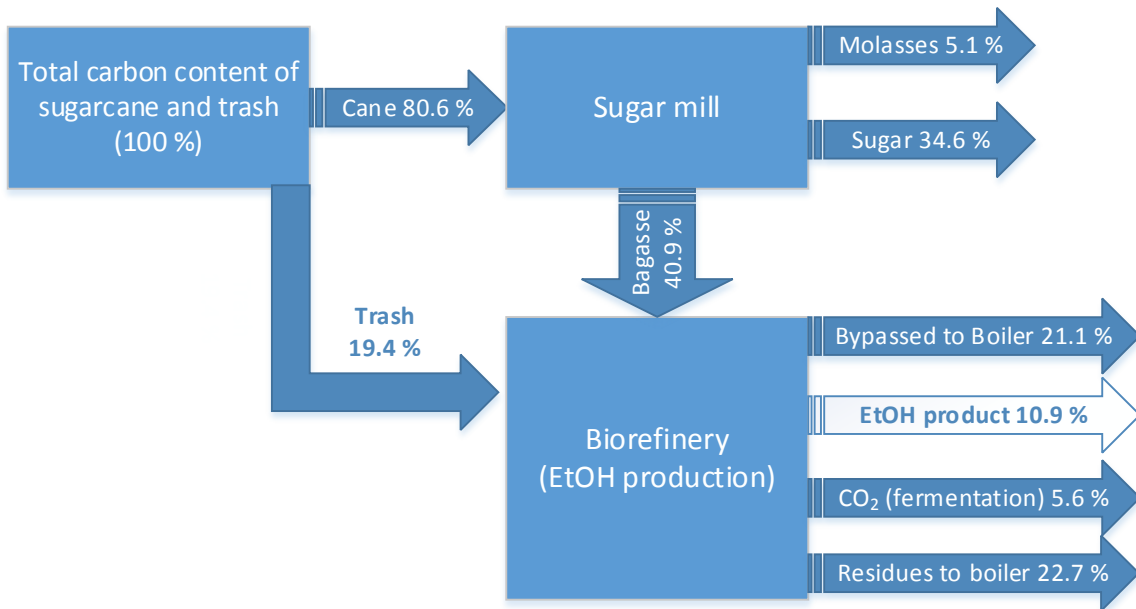

Figure S1 A schematic diagram of carbon flows through a biorefinery scenario (from sugarcane to final products).
